# Supplementary material for: Angiotensin I–Converting Enzyme Type 2 (ACE2) Gene Therapy Improves Glycemic Control in Diabetic Mice
Source: PubMed Central journal article supplement — Diabetes. 2010 Jul 26;59(10):2540–8. doi: 10.2337/db09-0782 (PMC3279528; doi:10.2337/db09-0782), 2010-07-26
Supplement: supp_db09-0782_DB090782Onlineappendix.pdf [file supp_db09-0782_DB090782Onlineappendix.pdf]

## ONLINE APPENDIX

Supplemental Table 1. Metabolic parameters in Ad-hACE2 and Ad-GFP infected db/db and db/m mice.

|                                        | Ad-GFP<br>db/m | Ad-GFP<br>db/db | Ad-hACE2-eGFP<br>db/m      | Ad-hACE2-eGFP<br>db/db |
|----------------------------------------|----------------|-----------------|----------------------------|------------------------|
| Body Weight (g)                        | 18.18 ± 0.56   | 24.70 ± 1.14*   | 18.82 ± 0.57               | 23.2 ± 1.42*           |
| Fasting Blood<br>Glucose (mg/dl)       | 85.75 ± 6.5    | 123.8 ± 13.2    | 126.00 ± 10.3 <sup>†</sup> | 144.4 ± 13.38          |
| IPGT AUC<br>(mg/dl/min)                | 12.68 ± 0.4    | 18.48 ± 1.8*    | 13.35 ± 0.5                | 18.05 ± 1.2*           |
| Insulin sensitivity<br>AUC (mg/dl/min) | 8.05 ± 0.9     | 10.9 ± 2.5      | 5.3 ± 0.1                  | 9.06 ± 0.8             |

Data represent metabolic parameters of 4 week-old db/m and db/db mice (n=6 per group) following infection with Ad-hACE2-eGFP or Ad-eGFP viruses. Statistical significance: \* $P < 0.001$  vs. treatment- matched db/m, <sup>†</sup> $P < 0.05$  vs. GFP treated controls. Abbreviation: IPGT AUC, intra-peritoneal glucose tolerance area under the curve.

Supplemental Figure 1

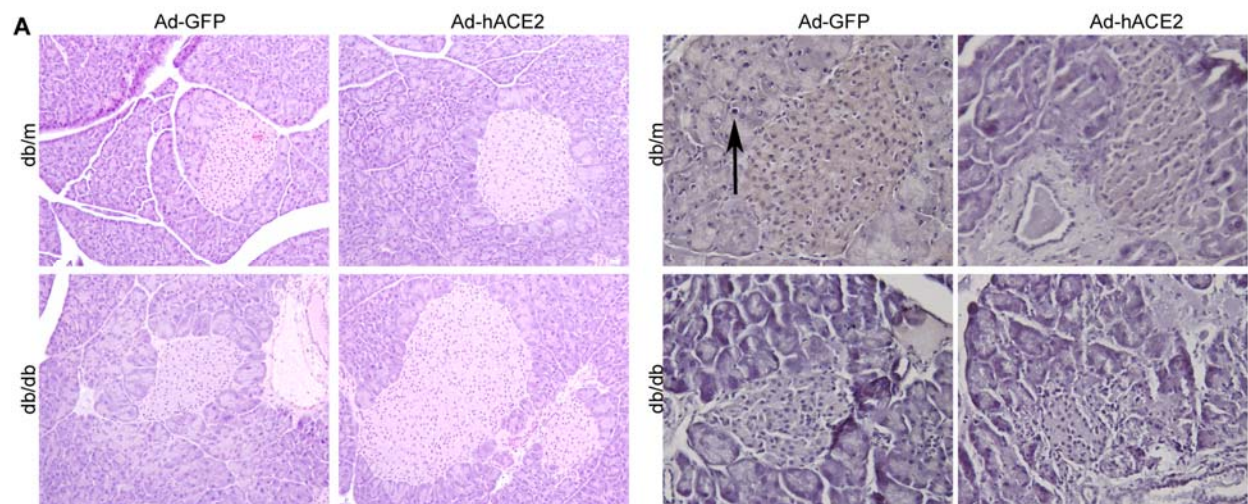

Adenoviral delivery via direct injection does not cause pancreatic inflammation. **A:** H&E staining revealed preservation of pancreatic architecture following direct viral injection. **B:** Immunostaining for CD3<sup>+</sup> revealed only occasional lymphocytes present in pancreatic tissue.

Supplemental Figure 2

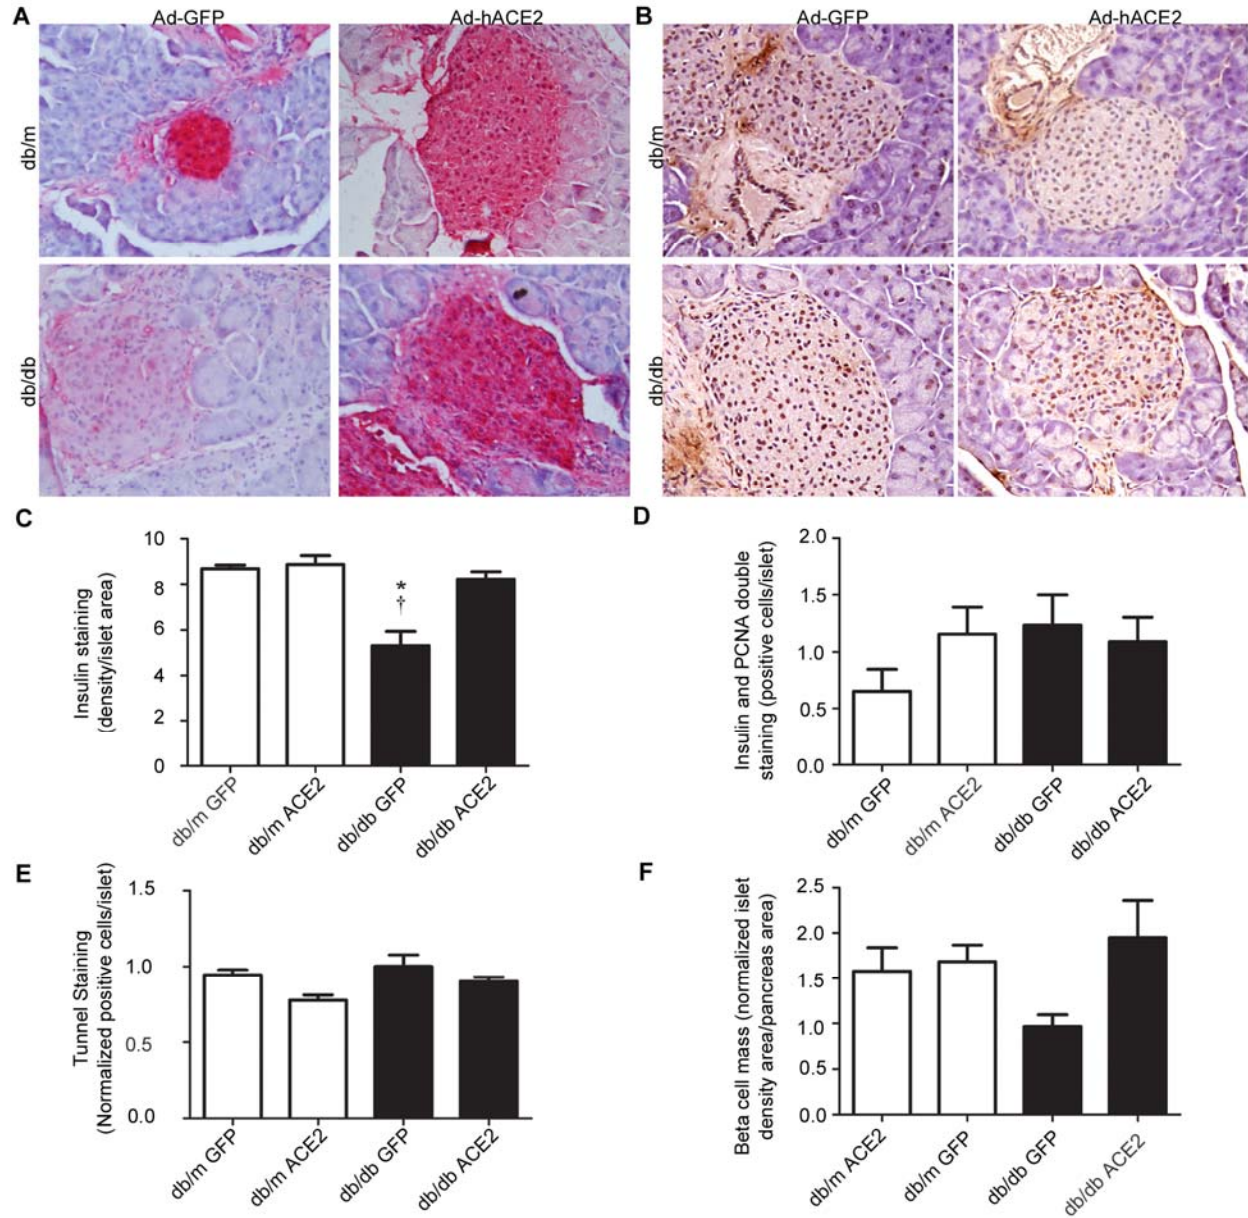

ACE2 overexpression enhanced islet insulin content in db/db mice in comparison to Ad-eGFP-expressing db/db mice (A,C). There was no significant change in pancreatic  $\beta$ -cell proliferation (D) apoptosis (C,E) or pancreatic  $\beta$ -cell mass (F). Values expressed as mean  $\pm$  SEM.
